# Supplementary figures and images for: De novo assembly of a PML nuclear subcompartment occurs through multiple pathways and induces telomere elongation
Source: Oxford University Press journal article supplement (doi:10.1242/jcs.084681), 2011-11-01

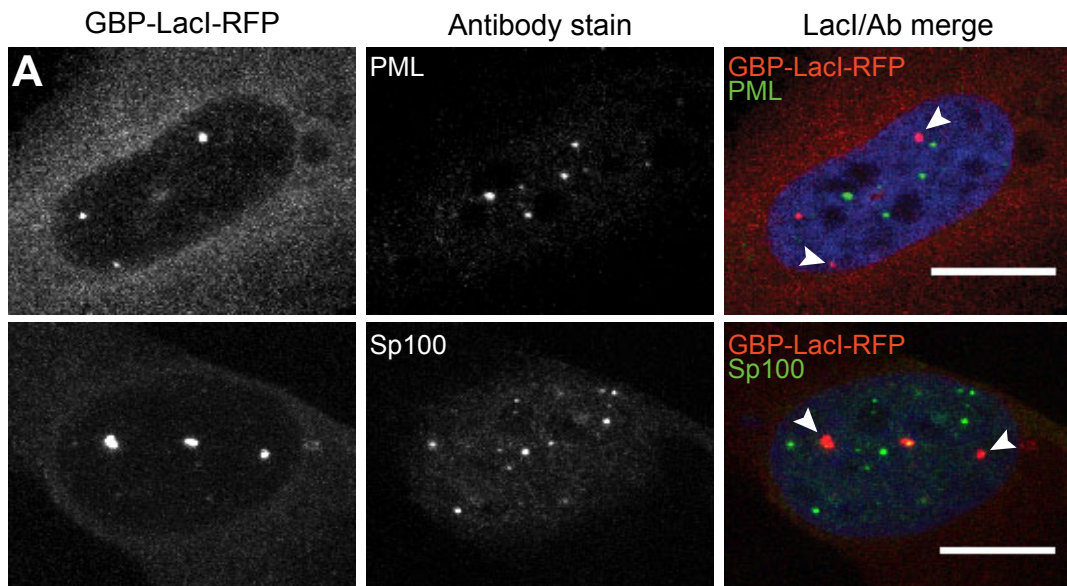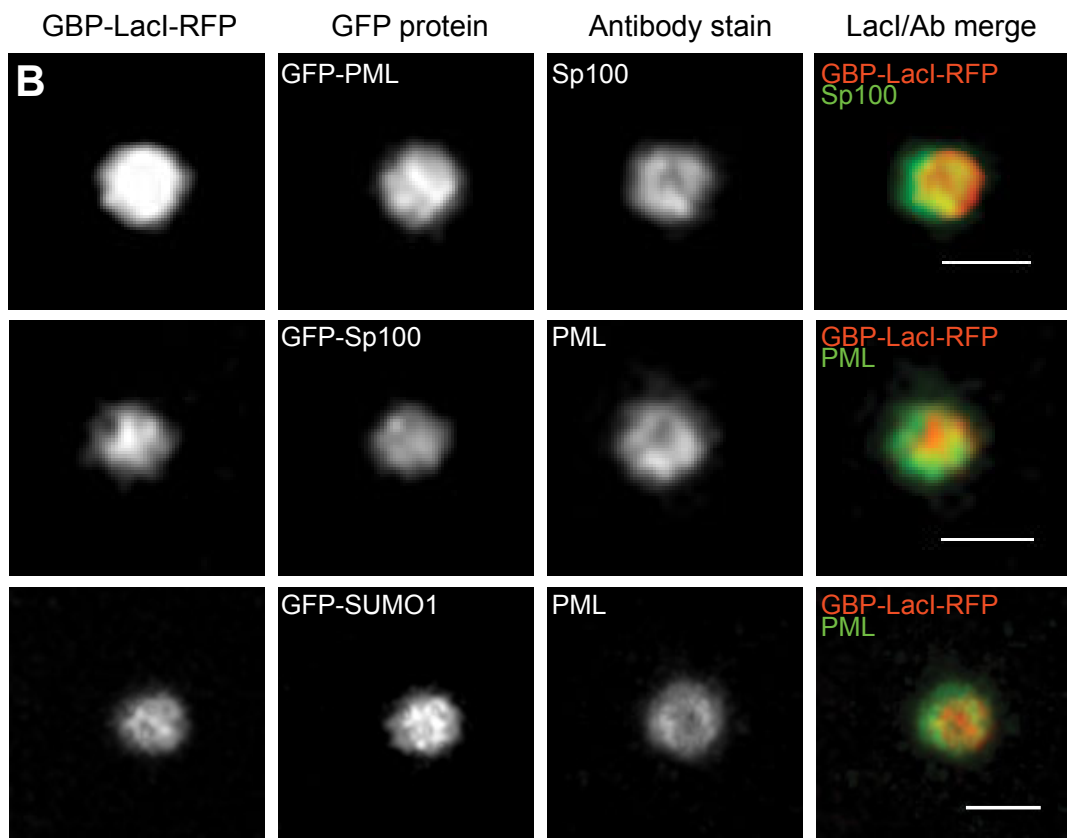

Supplement: jcs084681figs1.pdf [file jcs084681figs1.pdf]

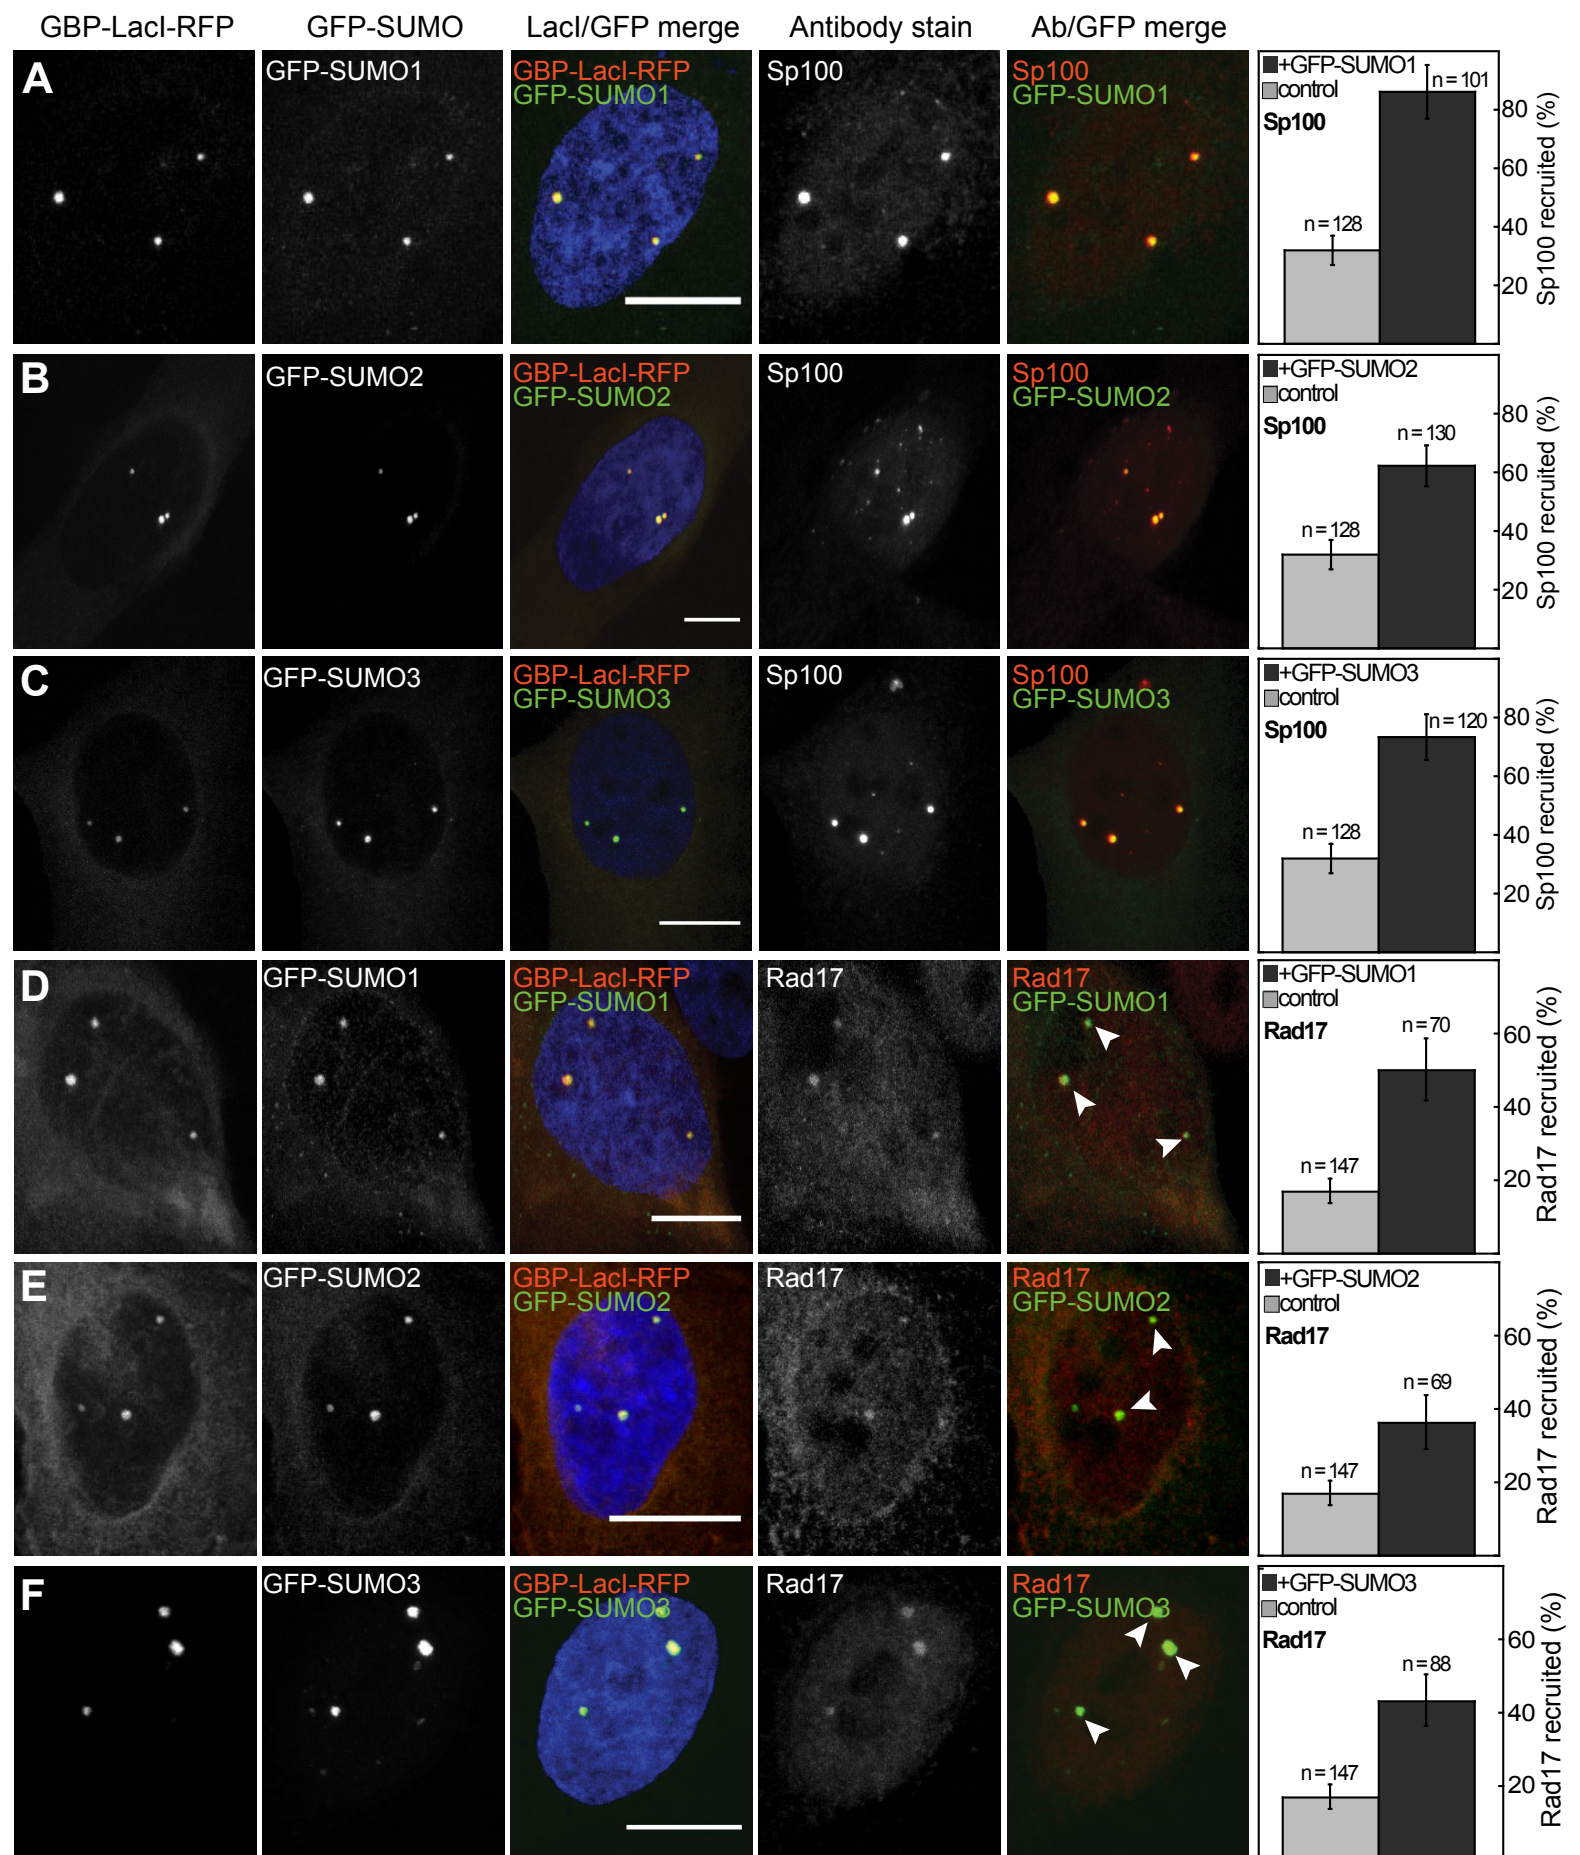

Supplement: jcs084681figs2.pdf [file jcs084681figs2.pdf]

# $\alpha$ -GFP western blot

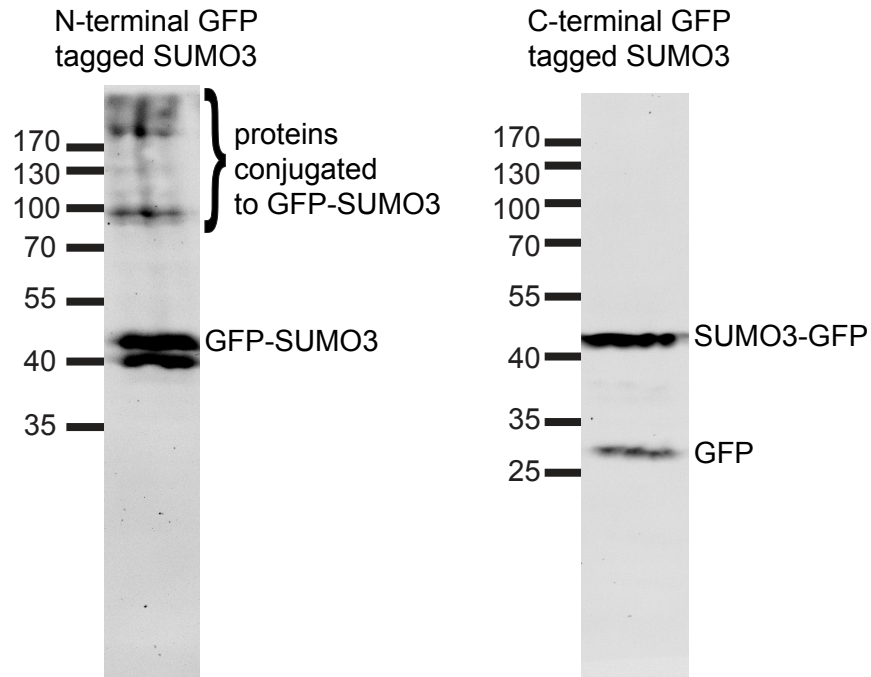

Supplement: jcs084681figs3.pdf [file jcs084681figs3.pdf]

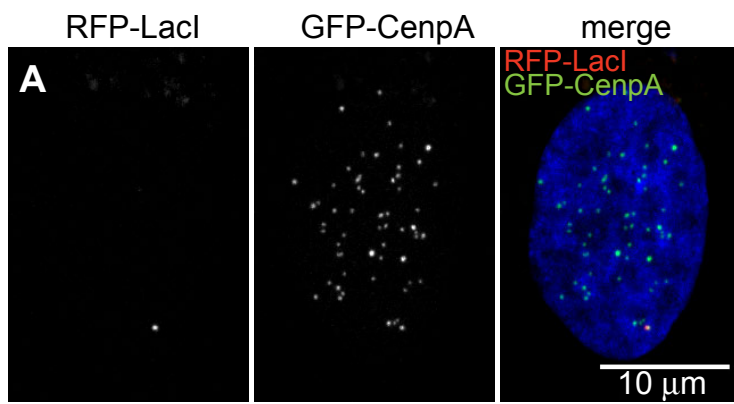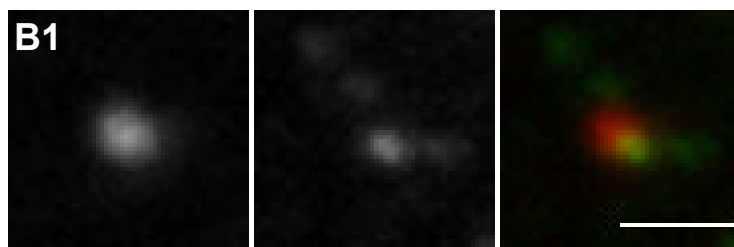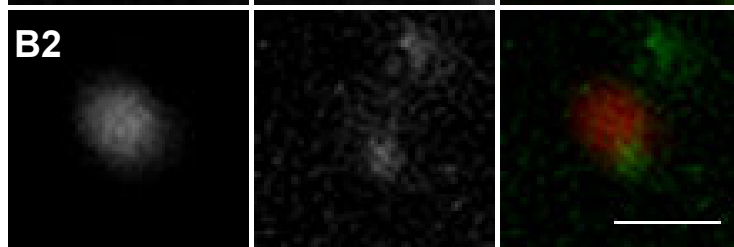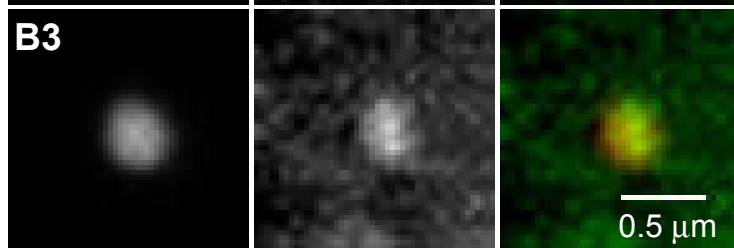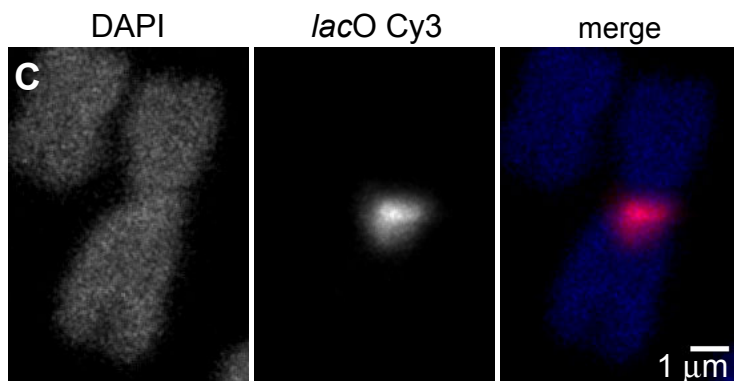

Supplement: jcs084681figs4.pdf [file jcs084681figs4.pdf]

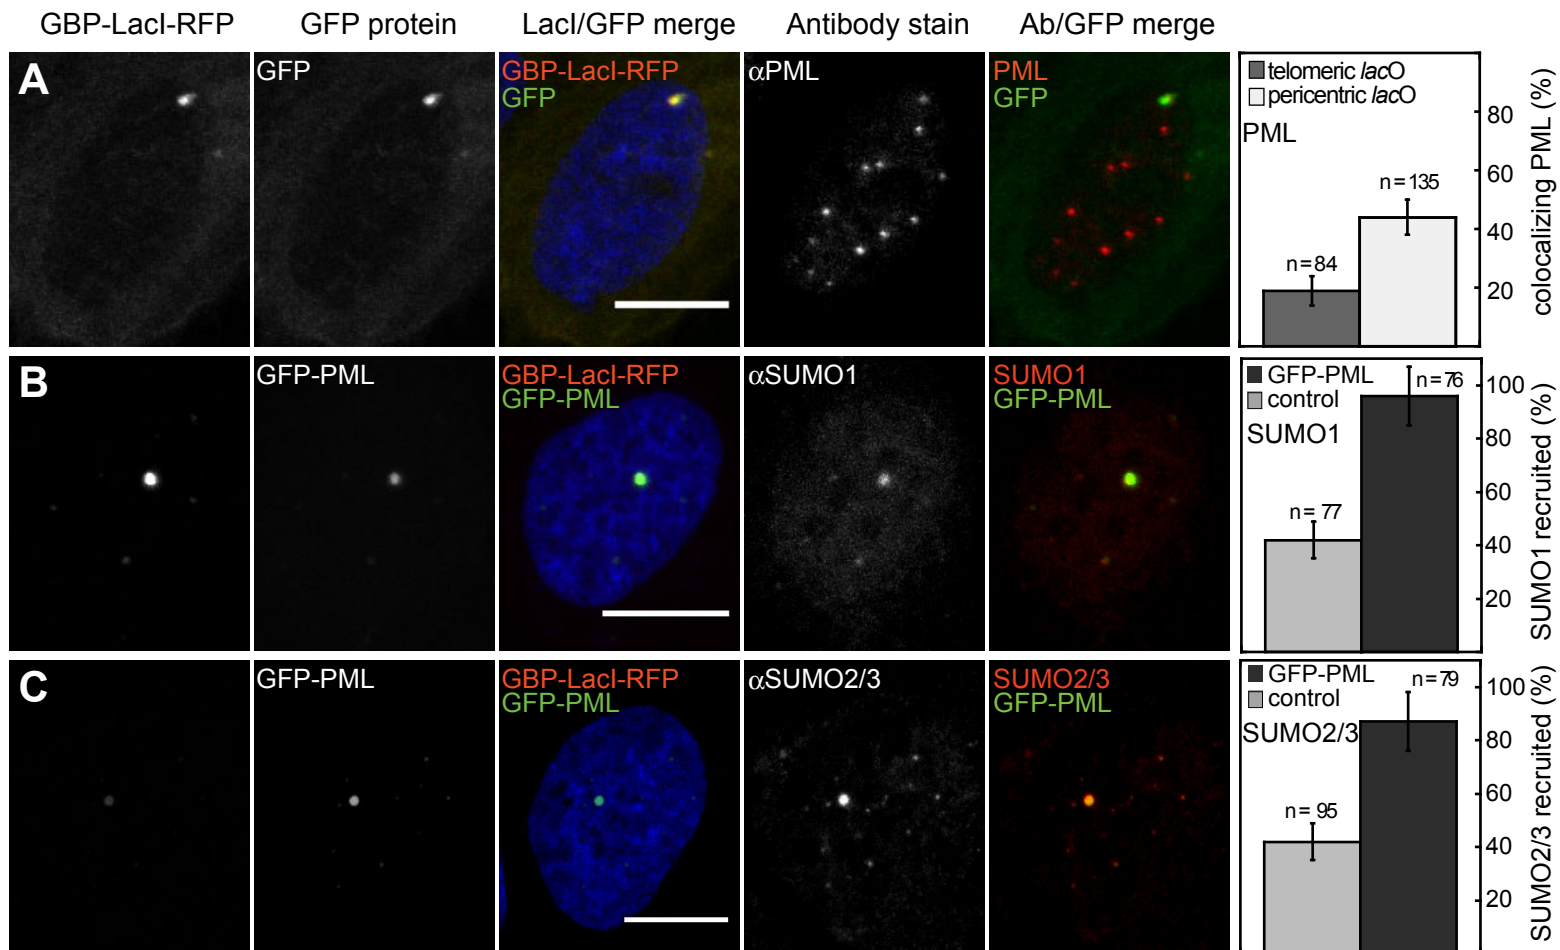

Supplement: jcs084681figs5.pdf [file jcs084681figs5.pdf]

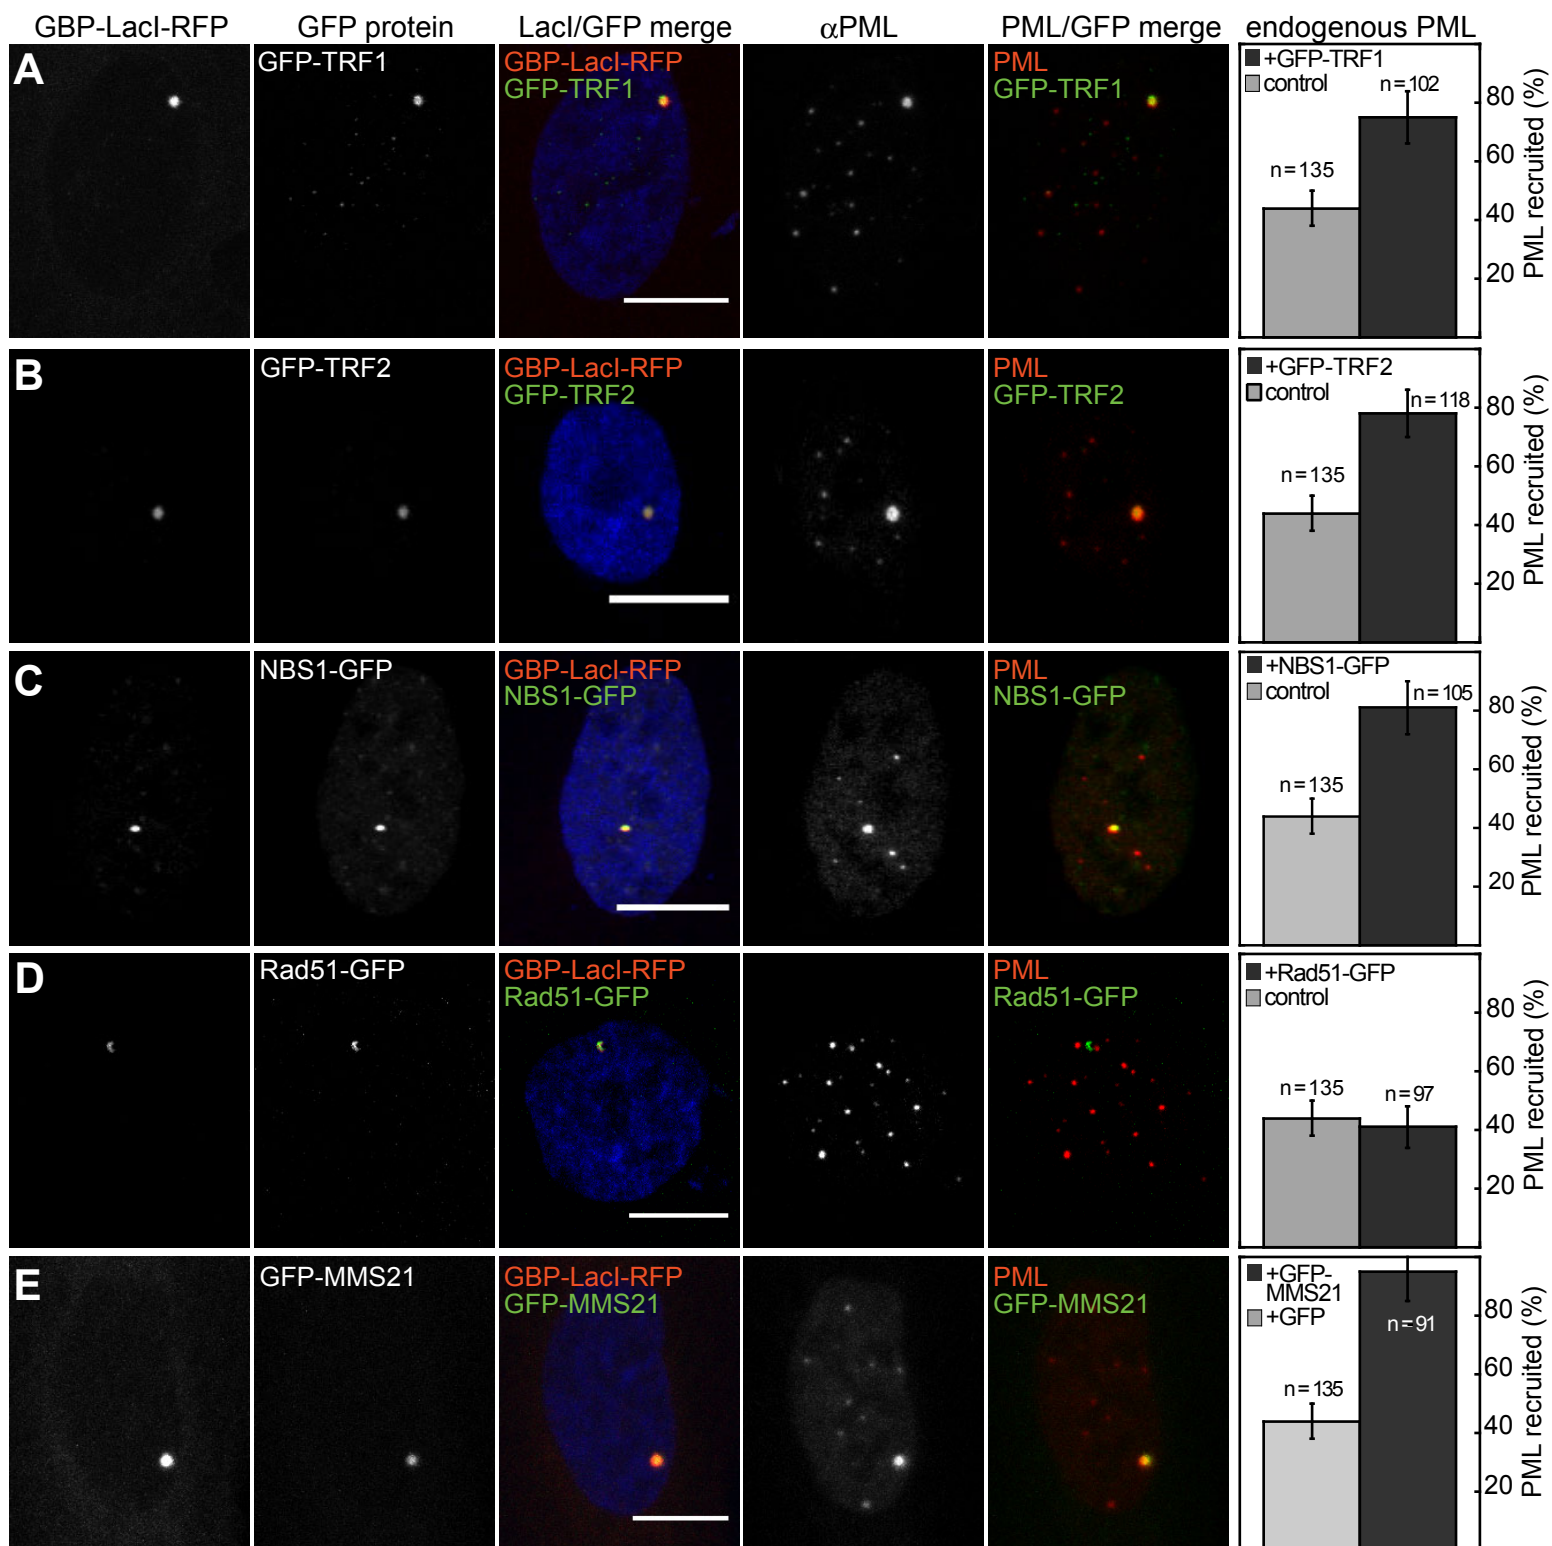

Supplement: jcs084681figs6.pdf [file jcs084681figs6.pdf]
